# Supplementary material for: Niobium uptake by a [P8W48O184]40−macrocyclic polyanion
Source: Royal Society of Chemistry journal article supplement (doi:10.1039/c9nj01907c), 2019-01-01
Supplement: c9nj01907c1.pdf [file c9nj01907c1.pdf]

## Supplementary information for:

### Niobium uptake by $[P_8W_{48}O_{184}]^{40-}$ macrocyclic polyanion

Alexandra A. Shmakova,<sup>[1]</sup> Victoria V. Volchek,<sup>[1]</sup> Vadim Yanshole<sup>[2,3]</sup>, Nikolay B. Kompankov,<sup>[1]</sup>  
Nicolas P. Martin,<sup>[4]</sup> May Nyman,<sup>[4]</sup> Pavel A. Abramov,<sup>[1,3]</sup> Maxim N. Sokolov\*<sup>[1,3]</sup>

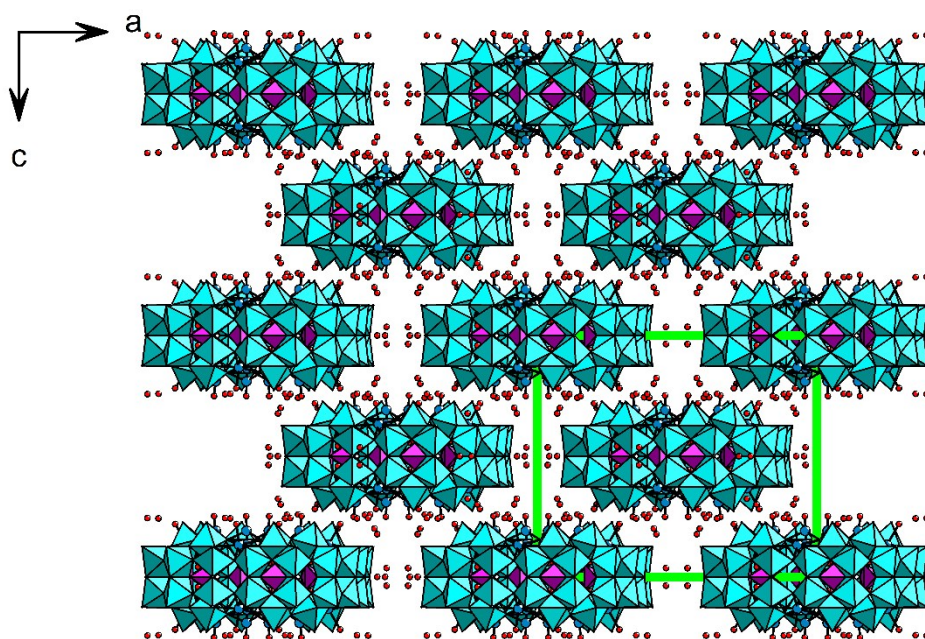

**Fig. S1.** Crystal packing of **1**.

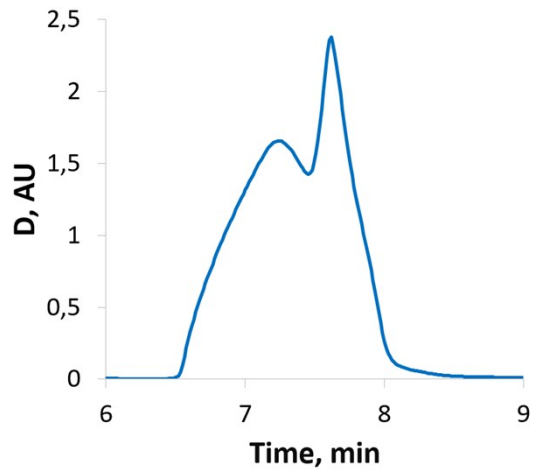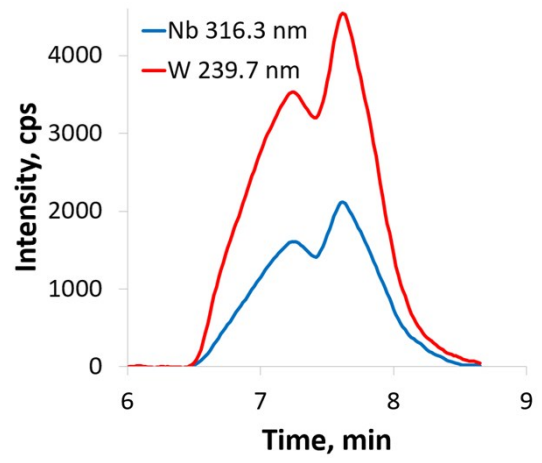

a)

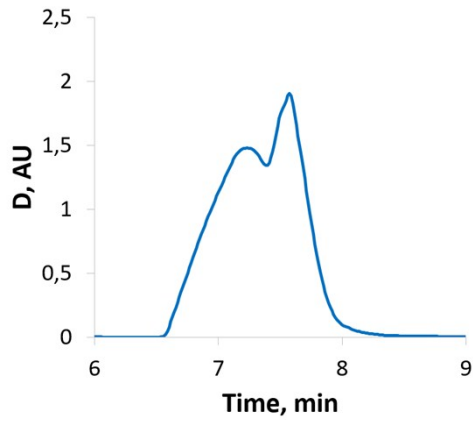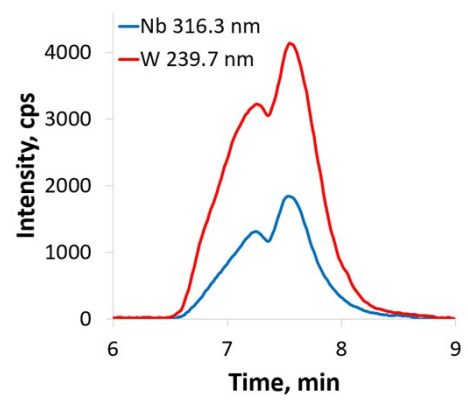

b)

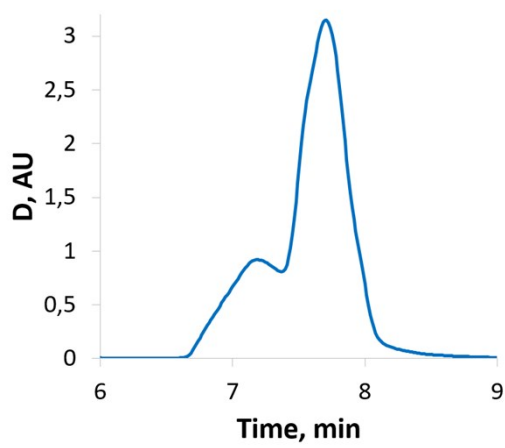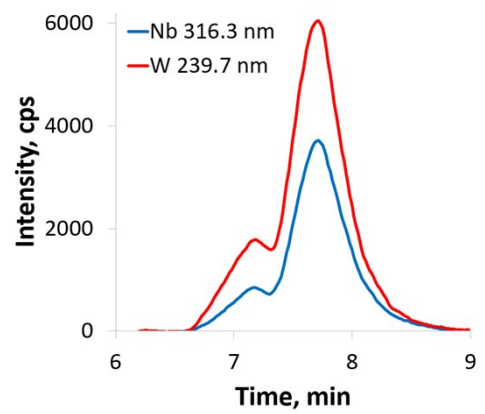

c)

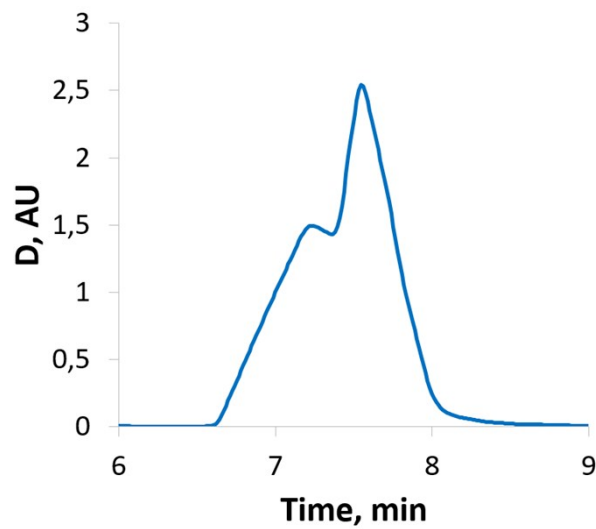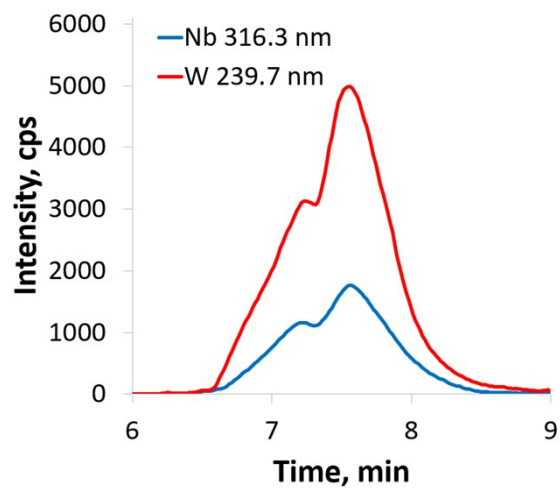

d)

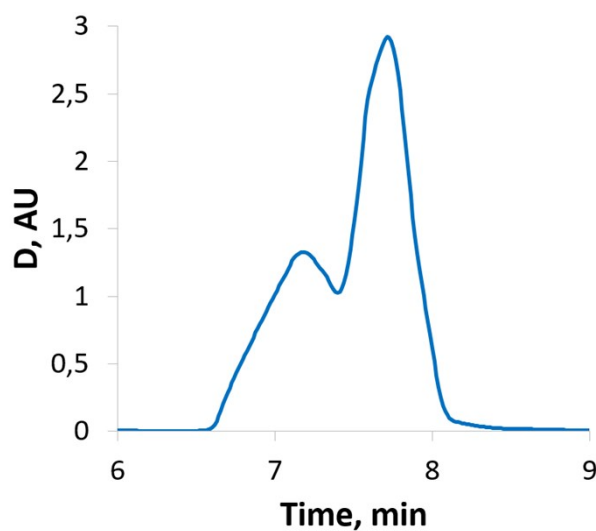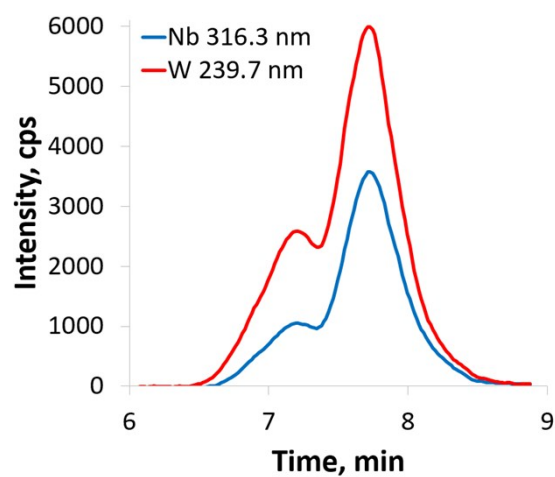

e)

**Fig. S2.** HPLC-UV (left) and HPLC-ICP-AES (right) chromatograms of A(a-e).

**Table S1.** Retention times for peaks observed by HPLC-ICP-AES for **A** and **B**.

| Compound    | Reference | Peak №1,<br>Time, min | Peak № 2<br>Time, min |
|-------------|-----------|-----------------------|-----------------------|
| <b>A(a)</b> | Fig. S2 a | 6,733                 | 7,103                 |
| <b>A(b)</b> | Fig. S2 b | 6,732                 | 7,061                 |
| <b>A(c)</b> | Fig. S2 c | 6,678                 | 7,184                 |
| <b>A(d)</b> | Fig. S2 d | 6,718                 | 7,033                 |
| <b>A(e)</b> | Fig. S2 e | 6,678                 | 7,198                 |
| <b>B(a)</b> | Fig. 4 a  | 6,496                 | 6,779                 |
| <b>B(b)</b> | Fig. 4 b  | 6,576                 | 6,810                 |
| <b>B(c)</b> | Fig. 4 c  | 6,980                 | 7,263                 |
| <b>B(d)</b> | Fig. 4 d  | 6,898                 | 7,254                 |

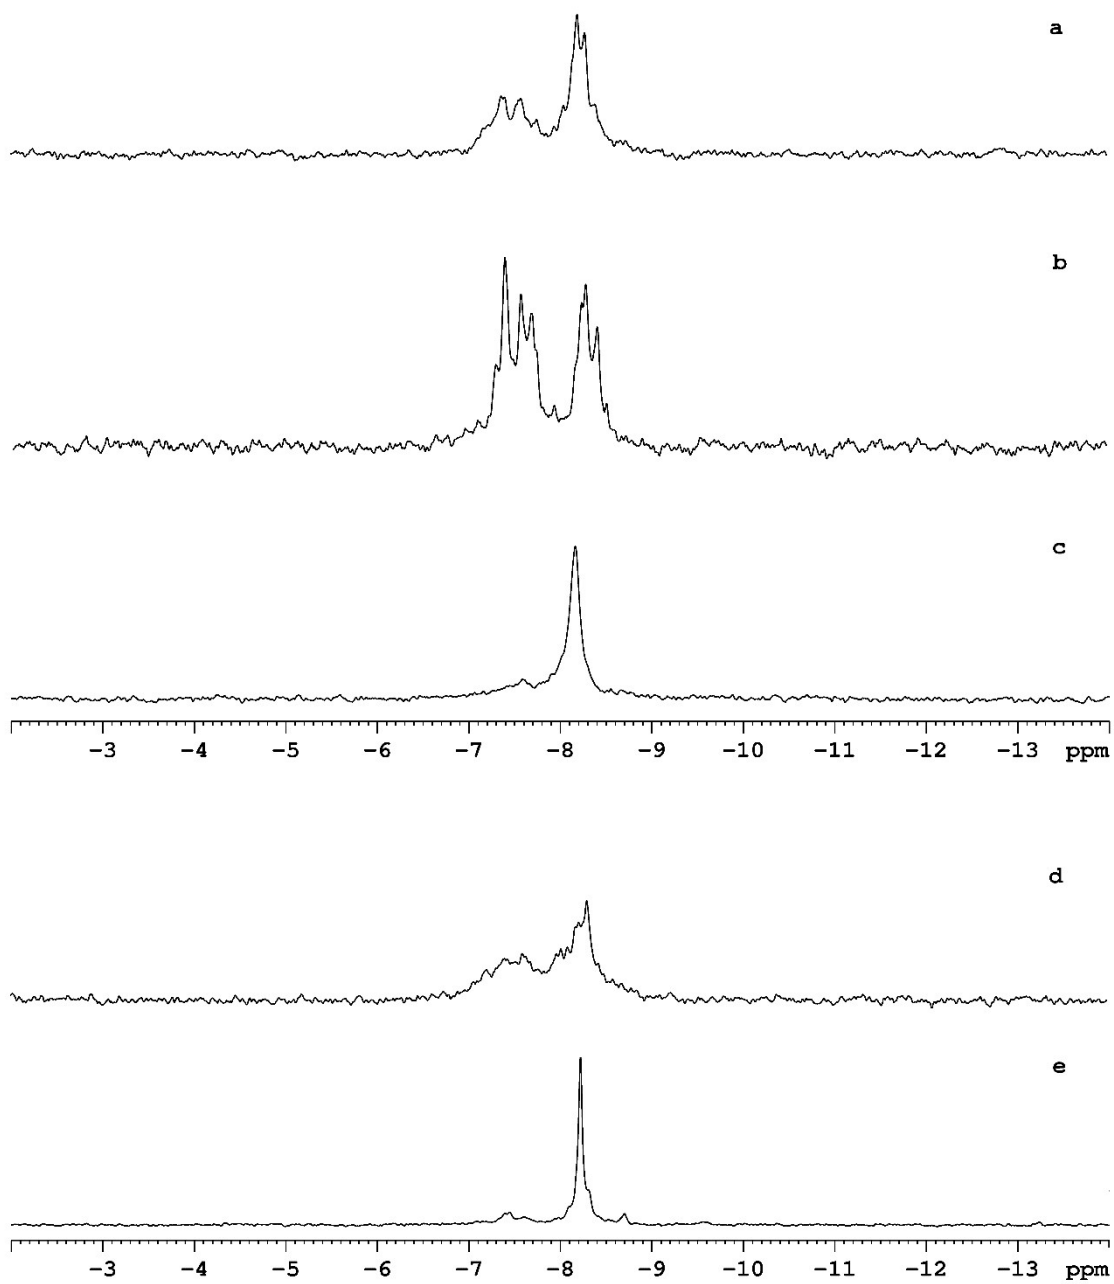

**Fig. S3.**  $^{31}\text{P}$  NMR spectra for  $\text{K}^+/\text{Li}^+$  set of Nb functionalized complexes.

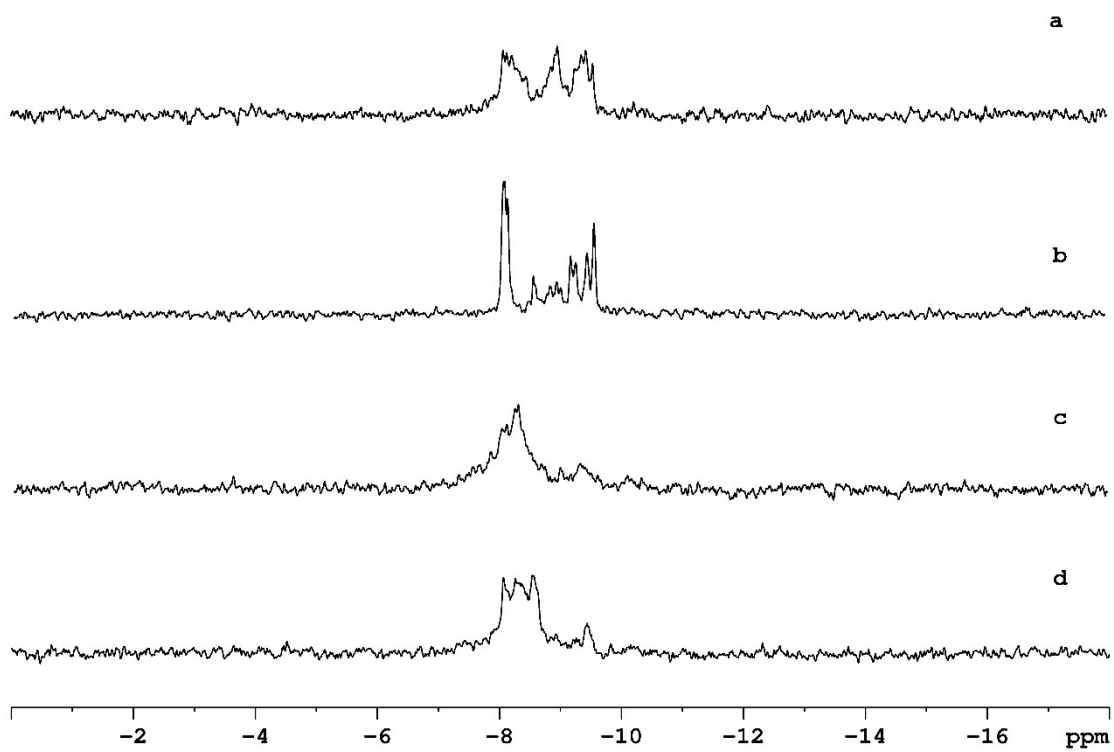

**Fig. S4.**  $^{31}\text{P}$  NMR spectra for  $\text{NH}_4^+/\text{Li}^+$  set of Nb functionalized complexes.

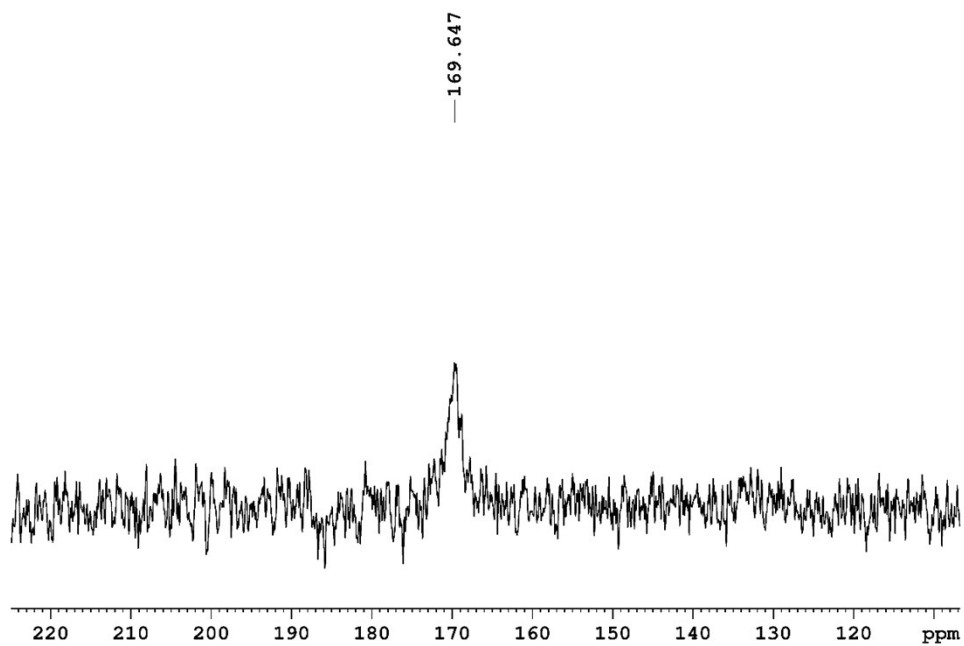

**Fig. S5.** Typical  $^{13}\text{C}$  NMR spectrum for Nb functionalized  $\{\text{P}_8\text{W}_{48}\}$  anions in aqueous solution.

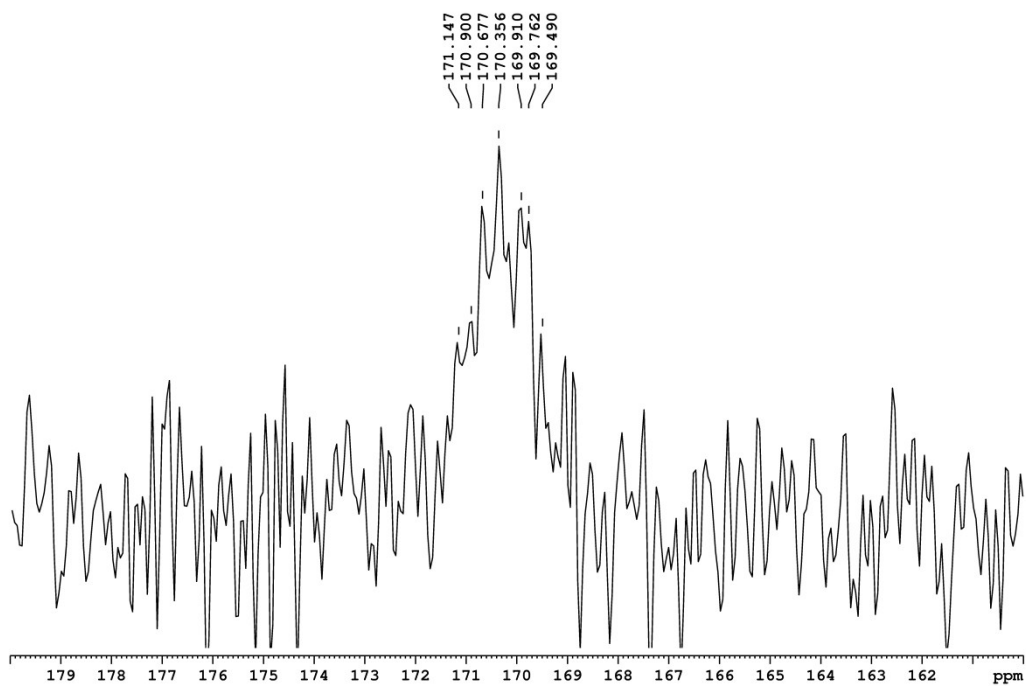

**Fig. S6.** Typical  $^{13}\text{C}$  MAS NMR spectrum for Nb functionalized  $\{\text{P}_8\text{W}_{48}\}$  anions in solid state.

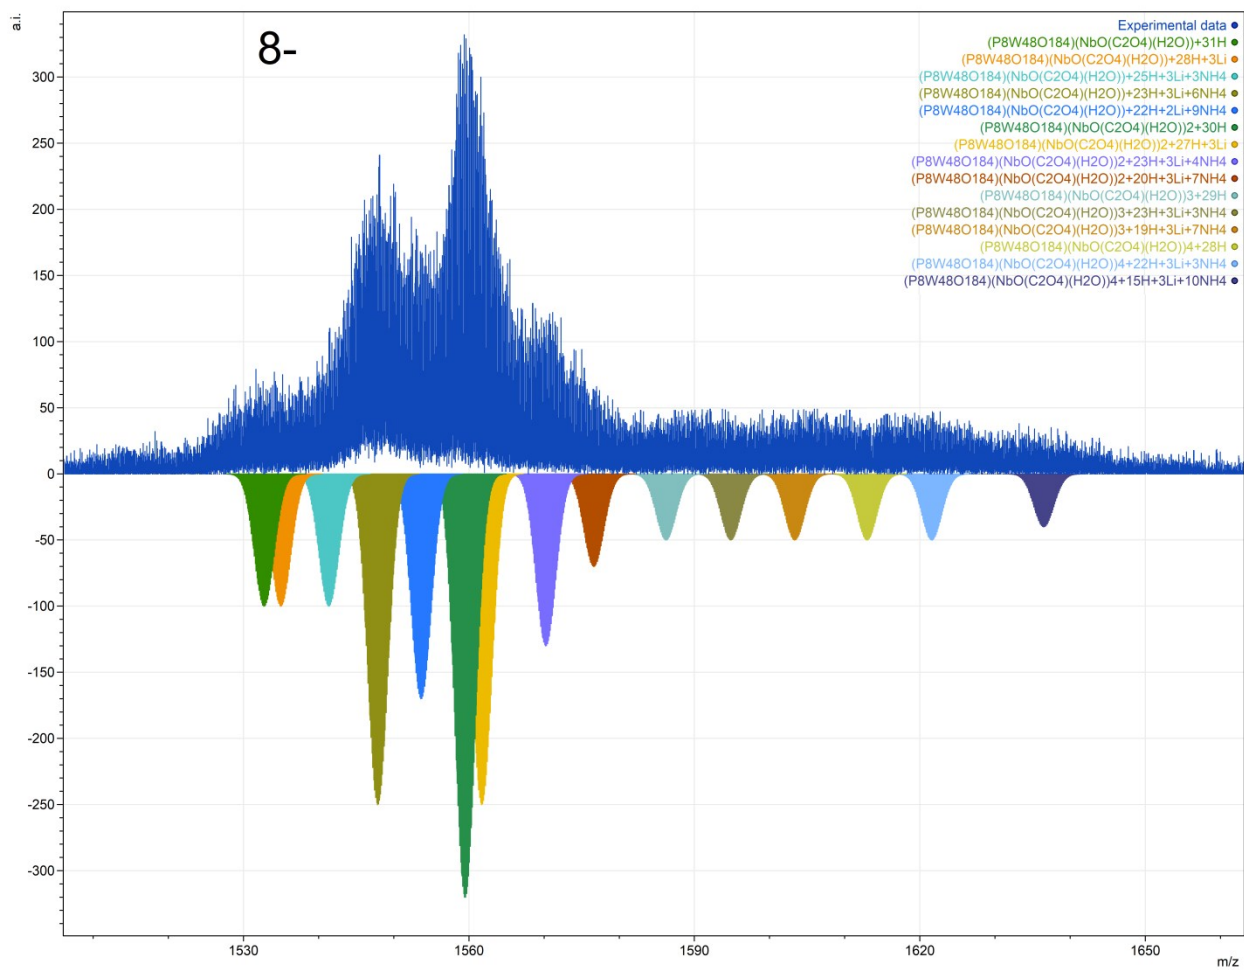

Fig. S7.



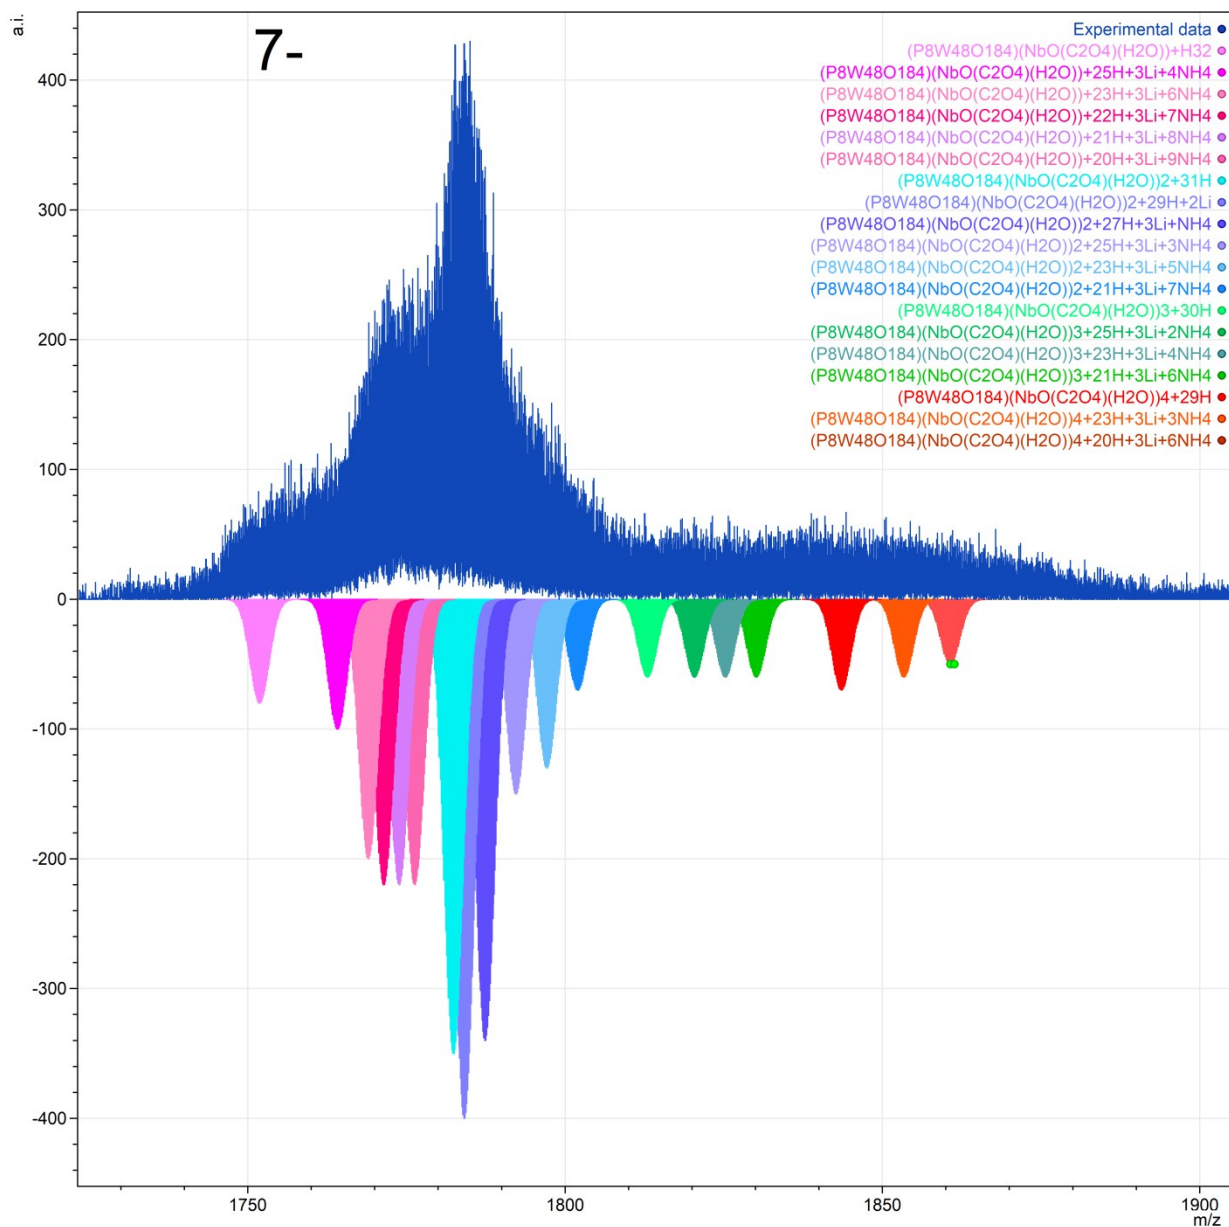

Fig. S8.

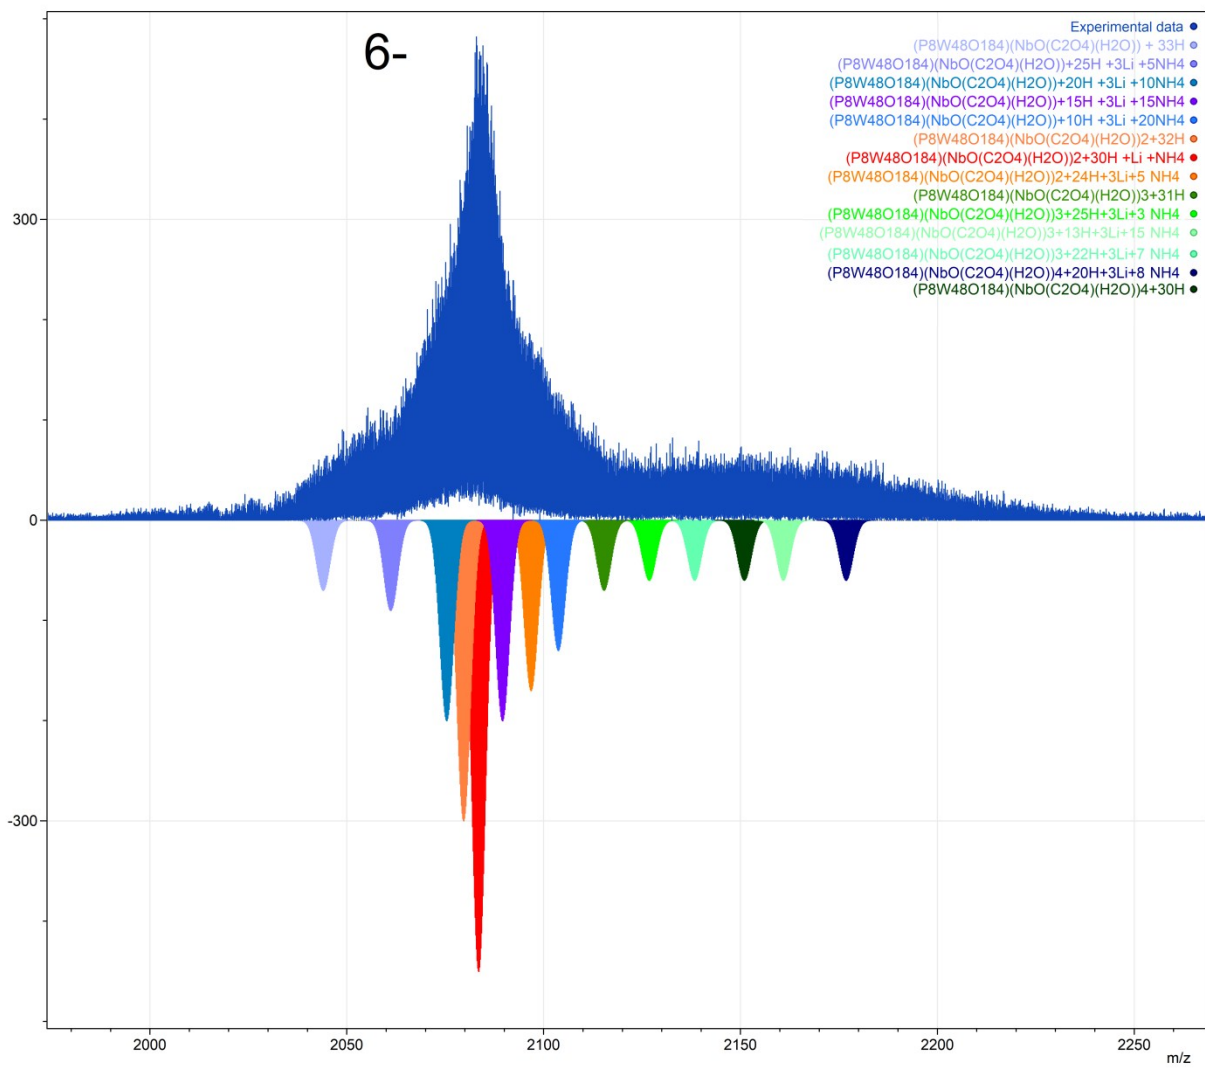

Fig. S9.

**Table S2.** Assignment of the ESI-MS spectra.

| <b>M/z</b> | <b>Assignment</b>                                                          |
|------------|----------------------------------------------------------------------------|
| 1362.2     | $(P_8W_{48}O_{184})(NbO(C_2O_4)(H_2O))^{39-} + 30H^+$                      |
| 1373.7     | $(P_8W_{48}O_{184})(NbO(C_2O_4)(H_2O))^{39-} + 22H^+ + 3Li^+ + 5NH_4^+$    |
| 1377.5     | $(P_8W_{48}O_{184})(NbO(C_2O_4)(H_2O))^{39-} + 20H^+ + 3Li^+ + 7NH_4^+$    |
| 1381.3     | $(P_8W_{48}O_{184})(NbO(C_2O_4)(H_2O))^{39-} + 18H^+ + 3Li^+ + 9NH_4^+$    |
| 1386.2     | $(P_8W_{48}O_{184})(NbO(C_2O_4)(H_2O))_2^{38-} + 29H^+$                    |
| 1395.7     | $(P_8W_{48}O_{184})(NbO(C_2O_4)(H_2O))_2^{38-} + 23H^+ + 3Li^+ + 4NH_4^+$  |
| 1409.9     | $(P_8W_{48}O_{184})(NbO(C_2O_4)(H_2O))_3^{37-} + 28H^+$                    |
| 1425.0     | $(P_8W_{48}O_{184})(NbO(C_2O_4)(H_2O))_3^{37-} + 28H^+ + 3Li^+ + 7NH_4^+$  |
| 1439.4     | $(P_8W_{48}O_{184})(NbO(C_2O_4)(H_2O))_4^{36-} + 22H^+ + 3Li^+ + 2NH_4^+$  |
| 1454.5     | $(P_8W_{48}O_{184})(NbO(C_2O_4)(H_2O))_4^{36-} + 14H^+ + 3Li^+ + 10NH_4^+$ |
| 1532.7     | $(P_8W_{48}O_{184})(NbO(C_2O_4)(H_2O))^{39-} + 31H^+$                      |
| 1535.0     | $(P_8W_{48}O_{184})(NbO(C_2O_4)(H_2O))^{39-} + 28H^+ + 3Li^+$              |
| 1541.2     | $(P_8W_{48}O_{184})(NbO(C_2O_4)(H_2O))^{39-} + 25H^+ + 3Li^+ + 3NH_4^+$    |
| 1547.9     | $(P_8W_{48}O_{184})(NbO(C_2O_4)(H_2O))^{39-} + 23H^+ + 3Li^+ + 6NH_4^+$    |
| 1553.6     | $(P_8W_{48}O_{184})(NbO(C_2O_4)(H_2O))^{39-} + 22H^+ + 2Li^+ + 9NH_4^+$    |
| 1559.4     | $(P_8W_{48}O_{184})(NbO(C_2O_4)(H_2O))_2^{38-} + 30H^+$                    |
| 1561.7     | $(P_8W_{48}O_{184})(NbO(C_2O_4)(H_2O))_2^{38-} + 27H^+ + 3Li^+$            |
| 1570.2     | $(P_8W_{48}O_{184})(NbO(C_2O_4)(H_2O))_2^{38-} + 23H^+ + 3Li^+ + 4NH_4^+$  |
| 1576.6     | $(P_8W_{48}O_{184})(NbO(C_2O_4)(H_2O))_2^{38-} + 20H^+ + 3Li^+ + 7NH_4^+$  |
| 1586.3     | $(P_8W_{48}O_{184})(NbO(C_2O_4)(H_2O))_3^{37-} + 29H^+$                    |
| 1594.8     | $(P_8W_{48}O_{184})(NbO(C_2O_4)(H_2O))_3^{37-} + 23H^+ + 3Li^+ + 3NH_4^+$  |
| 1603.3     | $(P_8W_{48}O_{184})(NbO(C_2O_4)(H_2O))_3^{37-} + 19H^+ + 3Li^+ + 7NH_4^+$  |
| 1612.9     | $(P_8W_{48}O_{184})(NbO(C_2O_4)(H_2O))_4^{36-} + 28H^+$                    |
| 1621.5     | $(P_8W_{48}O_{184})(NbO(C_2O_4)(H_2O))_4^{36-} + 22H^+ + 3Li^+ + 3NH_4^+$  |
| 1634.4     | $(P_8W_{48}O_{184})(NbO(C_2O_4)(H_2O))_4^{36-} + 15H^+ + 3Li^+ + 10NH_4^+$ |
| 1751.0     | $(P_8W_{48}O_{184})(NbO(C_2O_4)(H_2O))^{39-} + 32H^+$                      |
| 1764.1     | $(P_8W_{48}O_{184})(NbO(C_2O_4)(H_2O))^{39-} + 25H^+ + 3Li^+ + 4NH_4^+$    |
| 1769.0     | $(P_8W_{48}O_{184})(NbO(C_2O_4)(H_2O))^{39-} + 23H^+ + 3Li^+ + 6NH_4^+$    |
| 1771.4     | $(P_8W_{48}O_{184})(NbO(C_2O_4)(H_2O))^{39-} + 22H^+ + 3Li^+ + 7NH_4^+$    |
| 1773.8     | $(P_8W_{48}O_{184})(NbO(C_2O_4)(H_2O))^{39-} + 21H^+ + 3Li^+ + 8NH_4^+$    |
| 1776.3     | $(P_8W_{48}O_{184})(NbO(C_2O_4)(H_2O))^{39-} + 20H^+ + 3Li^+ + 9NH_4^+$    |
| 1782.5     | $(P_8W_{48}O_{184})(NbO(C_2O_4)(H_2O))_2^{38-} + 31H^+$                    |
| 1784.1     | $(P_8W_{48}O_{184})(NbO(C_2O_4)(H_2O))_2^{38-} + 29H^+ + 2Li^+$            |
| 1787.4     | $(P_8W_{48}O_{184})(NbO(C_2O_4)(H_2O))_2^{38-} + 27H^+ + 3Li^+ + NH_4^+$   |
| 1792.2     | $(P_8W_{48}O_{184})(NbO(C_2O_4)(H_2O))_2^{38-} + 25H^+ + 3Li^+ + 3NH_4^+$  |
| 1797.1     | $(P_8W_{48}O_{184})(NbO(C_2O_4)(H_2O))_2^{38-} + 23H^+ + 3Li^+ + 5NH_4^+$  |
| 1802.0     | $(P_8W_{48}O_{184})(NbO(C_2O_4)(H_2O))_2^{38-} + 21H^+ + 3Li^+ + 7NH_4^+$  |
| 1813.1     | $(P_8W_{48}O_{184})(NbO(C_2O_4)(H_2O))_3^{37-} + 30H^+$                    |
| 1820.4     | $(P_8W_{48}O_{184})(NbO(C_2O_4)(H_2O))_3^{37-} + 25H^+ + 3Li^+ + 2NH_4^+$  |
| 1825.2     | $(P_8W_{48}O_{184})(NbO(C_2O_4)(H_2O))_3^{37-} + 23H^+ + 3Li^+ + 4NH_4^+$  |
| 1830.0     | $(P_8W_{48}O_{184})(NbO(C_2O_4)(H_2O))_3^{37-} + 21H^+ + 3Li^+ + 6NH_4^+$  |
| 1843.6     | $(P_8W_{48}O_{184})(NbO(C_2O_4)(H_2O))_4^{36-} + 29H^+$                    |
| 1853.3     | $(P_8W_{48}O_{184})(NbO(C_2O_4)(H_2O))_4^{36-} + 23H^+ + 3Li^+ + 3NH_4^+$  |

|        |                                                                                                                                                         |
|--------|---------------------------------------------------------------------------------------------------------------------------------------------------------|
| 1860.7 | $(\text{P}_8\text{W}_{48}\text{O}_{184})(\text{NbO}(\text{C}_2\text{O}_4)(\text{H}_2\text{O}))_4^{36-} + 20\text{H}^+ + 3\text{Li}^+ + 6\text{NH}_4^+$  |
| 2044.1 | $(\text{P}_8\text{W}_{48}\text{O}_{184})(\text{NbO}(\text{C}_2\text{O}_4)(\text{H}_2\text{O}))^{39-} + 33\text{H}^+$                                    |
| 2075.3 | $(\text{P}_8\text{W}_{48}\text{O}_{184})(\text{NbO}(\text{C}_2\text{O}_4)(\text{H}_2\text{O}))^{39-} + 20\text{H}^+ + 3\text{Li}^+ + 10\text{NH}_4^+$   |
| 2079.8 | $(\text{P}_8\text{W}_{48}\text{O}_{184})(\text{NbO}(\text{C}_2\text{O}_4)(\text{H}_2\text{O}))_2^{38-} + 32\text{H}^+$                                  |
| 2083.6 | $(\text{P}_8\text{W}_{48}\text{O}_{184})(\text{NbO}(\text{C}_2\text{O}_4)(\text{H}_2\text{O}))_2^{38-} + 30\text{H}^+ + \text{Li}^+ + \text{NH}_4^+$    |
| 2089.5 | $(\text{P}_8\text{W}_{48}\text{O}_{184})(\text{NbO}(\text{C}_2\text{O}_4)(\text{H}_2\text{O}))^{39-} + 15\text{H}^+ + 3\text{Li}^+ + 15\text{NH}_4^+$   |
| 2096.8 | $(\text{P}_8\text{W}_{48}\text{O}_{184})(\text{NbO}(\text{C}_2\text{O}_4)(\text{H}_2\text{O}))_2^{38-} + 24\text{H}^+ + 3\text{Li}^+ + 5\text{NH}_4^+$  |
| 2103.7 | $(\text{P}_8\text{W}_{48}\text{O}_{184})(\text{NbO}(\text{C}_2\text{O}_4)(\text{H}_2\text{O}))^{39-} + 10\text{H}^+ + 3\text{Li}^+ + 20\text{NH}_4^+$   |
| 2115.4 | $(\text{P}_8\text{W}_{48}\text{O}_{184})(\text{NbO}(\text{C}_2\text{O}_4)(\text{H}_2\text{O}))_3^{37-} + 31\text{H}^+$                                  |
| 2126.8 | $(\text{P}_8\text{W}_{48}\text{O}_{184})(\text{NbO}(\text{C}_2\text{O}_4)(\text{H}_2\text{O}))_3^{37-} + 25\text{H}^+ + 3\text{Li}^+ + 3\text{NH}_4^+$  |
| 2138.4 | $(\text{P}_8\text{W}_{48}\text{O}_{184})(\text{NbO}(\text{C}_2\text{O}_4)(\text{H}_2\text{O}))_3^{37-} + 22\text{H}^+ + 3\text{Li}^+ + 7\text{NH}_4^+$  |
| 2151.0 | $(\text{P}_8\text{W}_{48}\text{O}_{184})(\text{NbO}(\text{C}_2\text{O}_4)(\text{H}_2\text{O}))_4^{36-} + 30\text{H}^+$                                  |
| 2161.0 | $(\text{P}_8\text{W}_{48}\text{O}_{184})(\text{NbO}(\text{C}_2\text{O}_4)(\text{H}_2\text{O}))_3^{37-} + 13\text{H}^+ + 3\text{Li}^+ + 15\text{NH}_4^+$ |
| 2161.1 | $(\text{P}_8\text{W}_{48}\text{O}_{184})(\text{NbO}(\text{C}_2\text{O}_4)(\text{H}_2\text{O}))^{39-} + 25\text{H}^+ + 3\text{Li}^+ + 5\text{NH}_4^+$    |
| 2176.9 | $(\text{P}_8\text{W}_{48}\text{O}_{184})(\text{NbO}(\text{C}_2\text{O}_4)(\text{H}_2\text{O}))_4^{36-} + 20\text{H}^+ + 3\text{Li}^+ + 8\text{NH}_4^+$  |

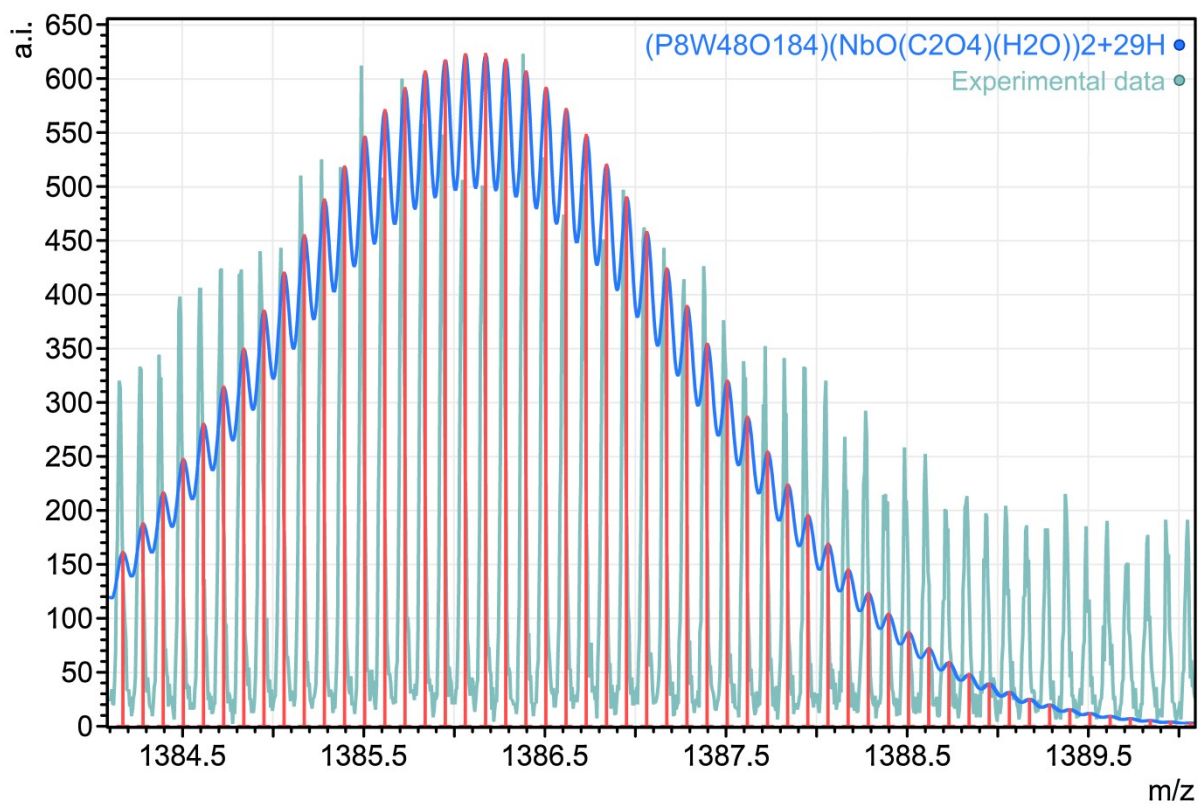

**Fig. S10.** Comparison between experimental and calculated values of isotopic patterns for  $\{[P_8W_{48}O_{184}(NbO(C_2O_4)(H_2O))_2 + 29H]^9-\}$

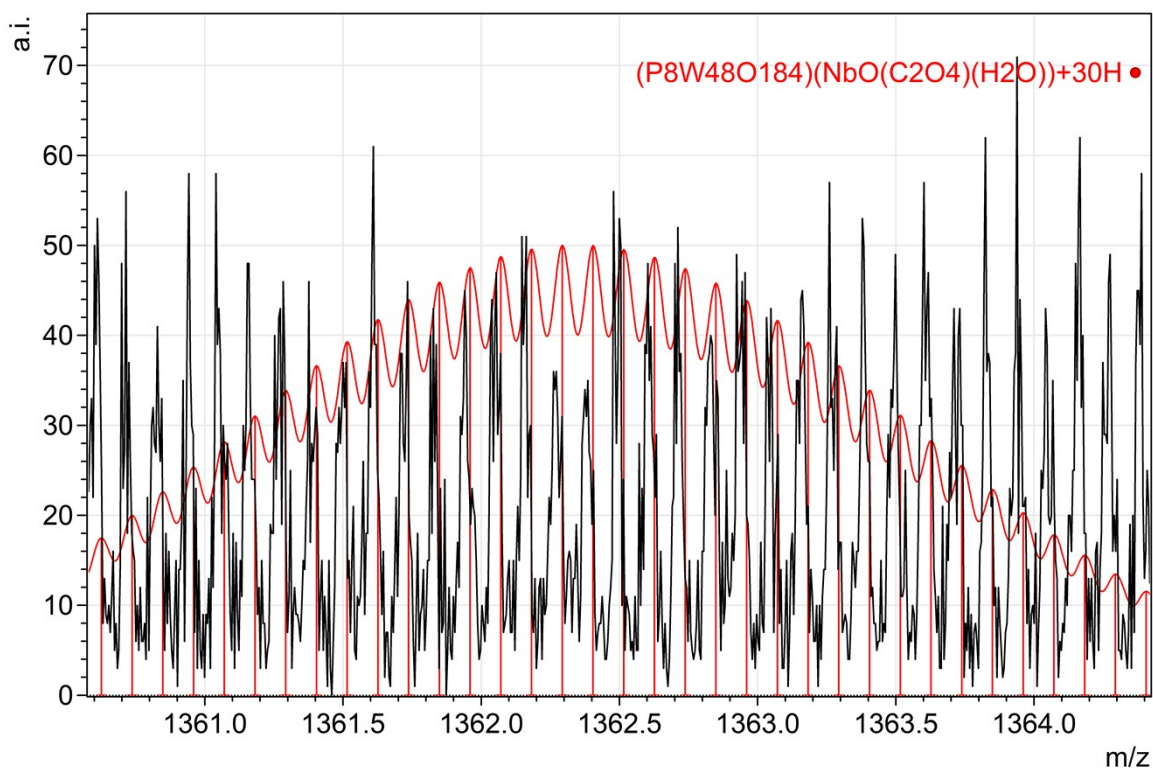

**Fig. S11.** Comparison between experimental and calculated values of isotopic patterns for  $\{[P_8W_{48}O_{184}(NbO(C_2O_4)(H_2O)) + 30H^+]^{9-}\}$

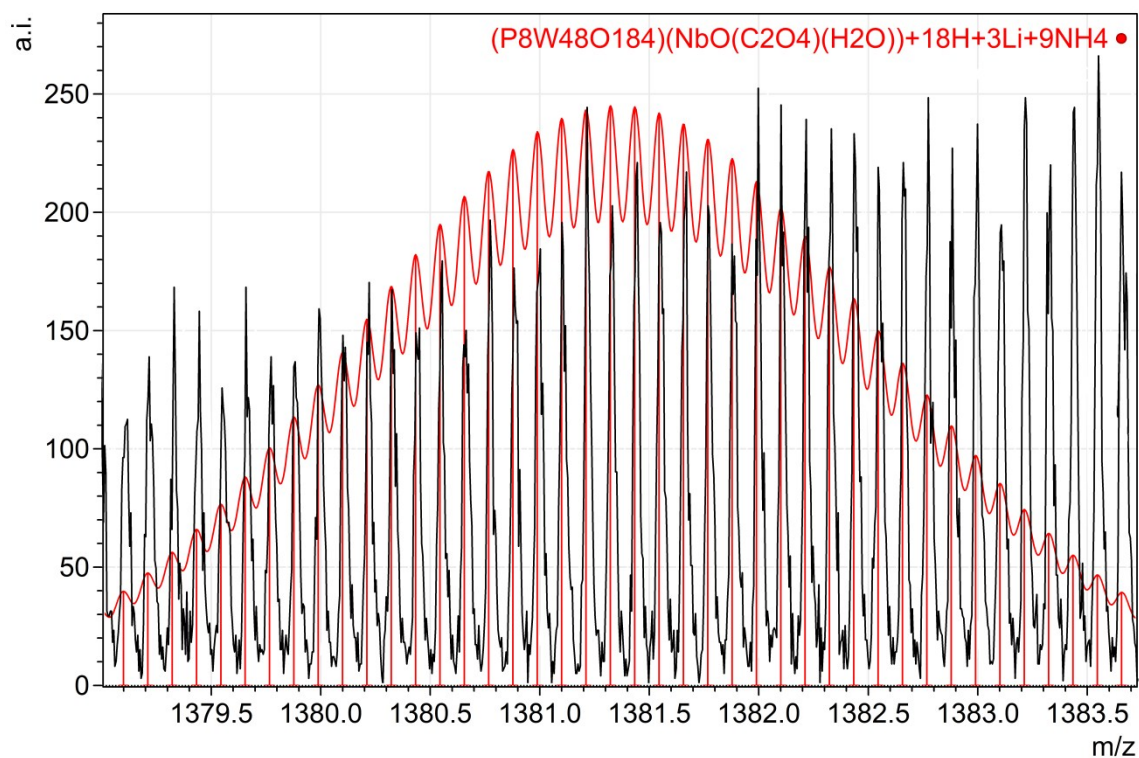

**Fig. S12.** Comparison between experimental and calculated values of isotopic patterns for  $\{[P_8W_{48}O_{184}(NbO(C_2O_4)(H_2O)) + 18H^+ + 3Li^+ + 9NH_4^+]^{9-}\}$

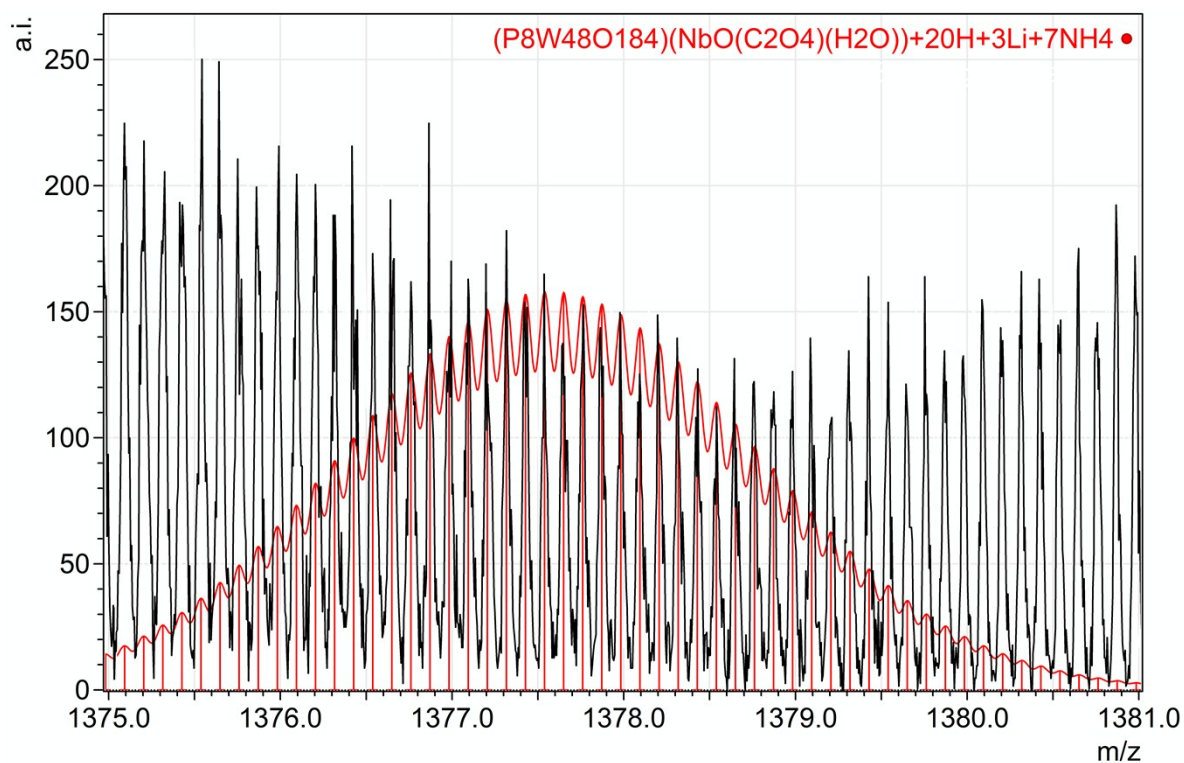

**Fig. S13.** Comparison between experimental and calculated values of isotopic patterns for  $\{[P_8W_{48}O_{184}(NbO(C_2O_4)(H_2O)) + 20H^+ + 3Li^+ + 7NH_4^+]^{9-}$

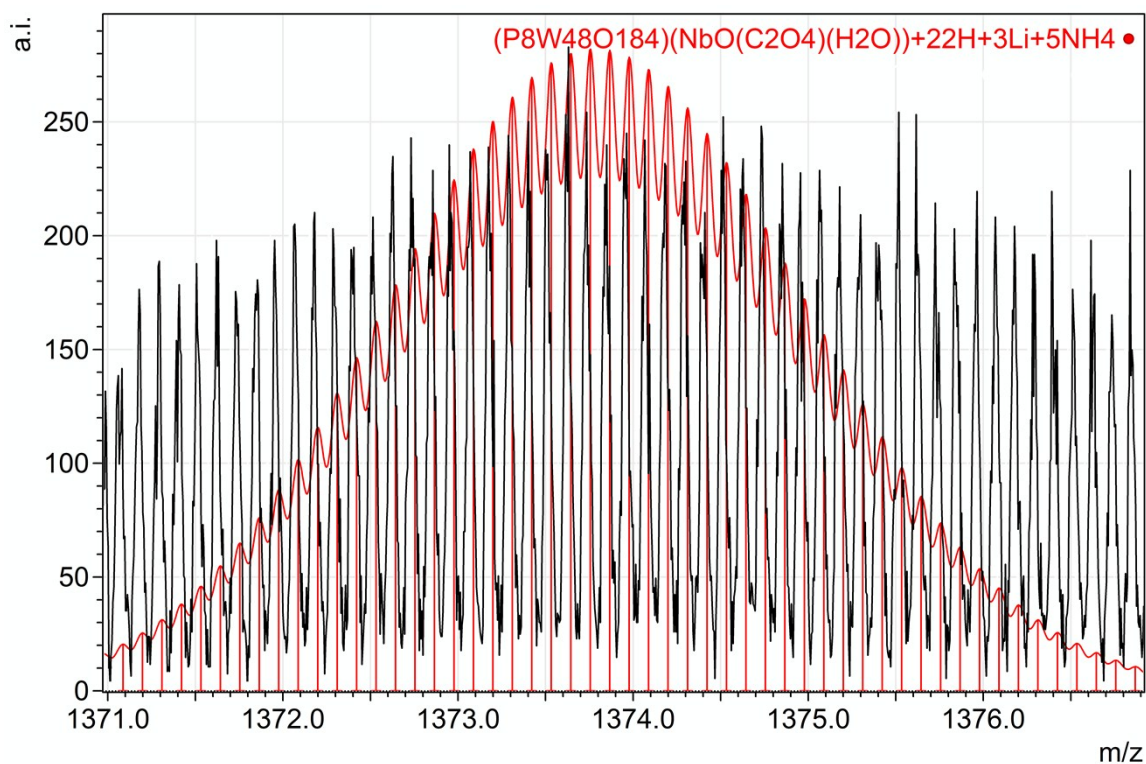

**Fig. S14.** Comparison between experimental and calculated values of isotopic patterns for  $\{[P_8W_{48}O_{184}(NbO(C_2O_4)(H_2O)) + 22H^+ + 3Li^+ + 5NH_4^+]^{9-}$

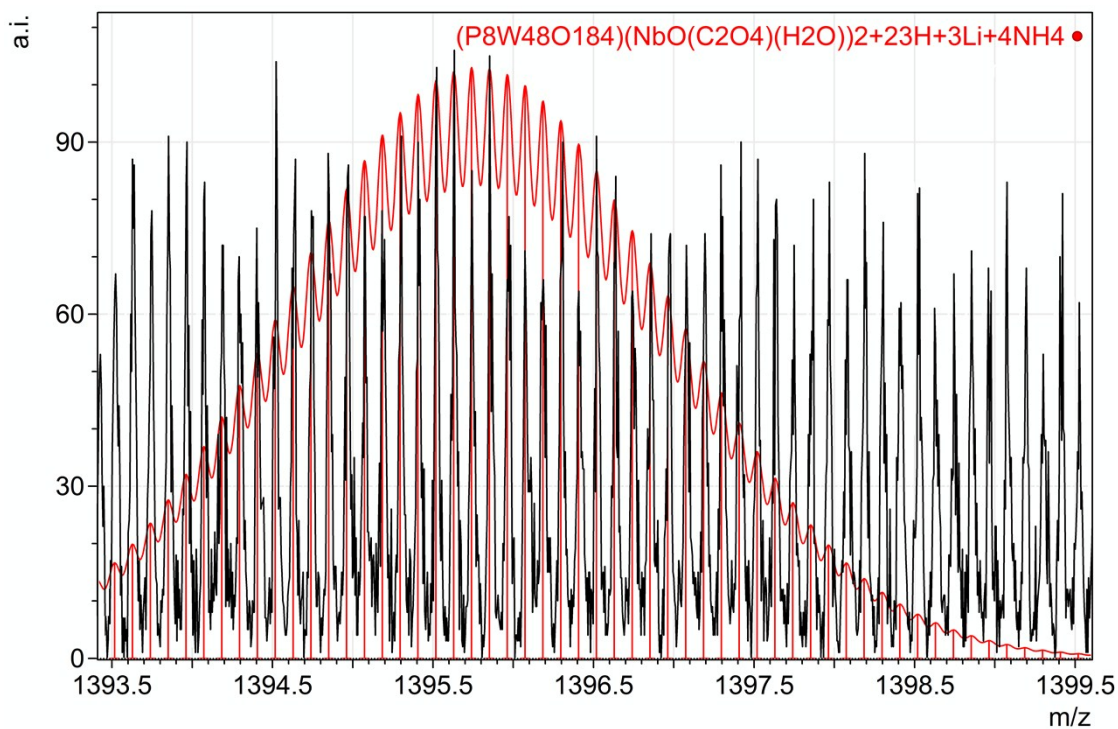

**Fig. S15.** Comparison between experimental and calculated values of isotopic patterns for  $\{[P_8W_{48}O_{184}(NbO(C_2O_4)(H_2O))_2 + 23H^+ + 3Li^+ + 4NH_4^+]\}^{8-}$

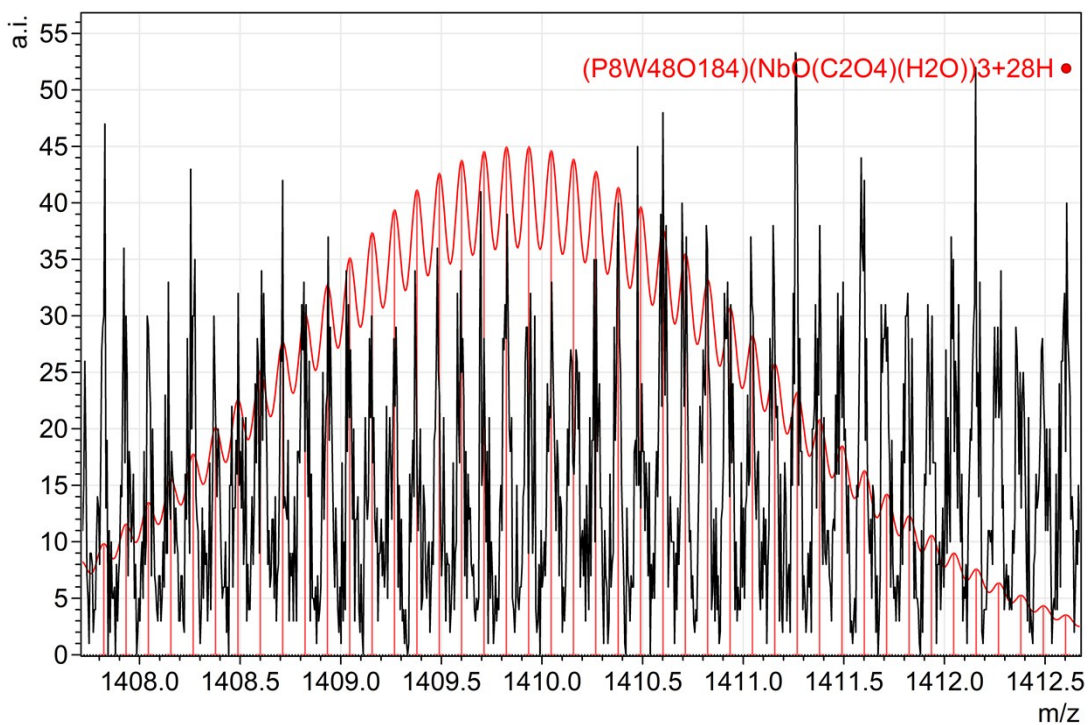

**Fig. S16.** Comparison between experimental and calculated values of isotopic patterns for  $\{[P_8W_{48}O_{184}(NbO(C_2O_4)(H_2O))_3 + 28H^+]\}^{9-}$



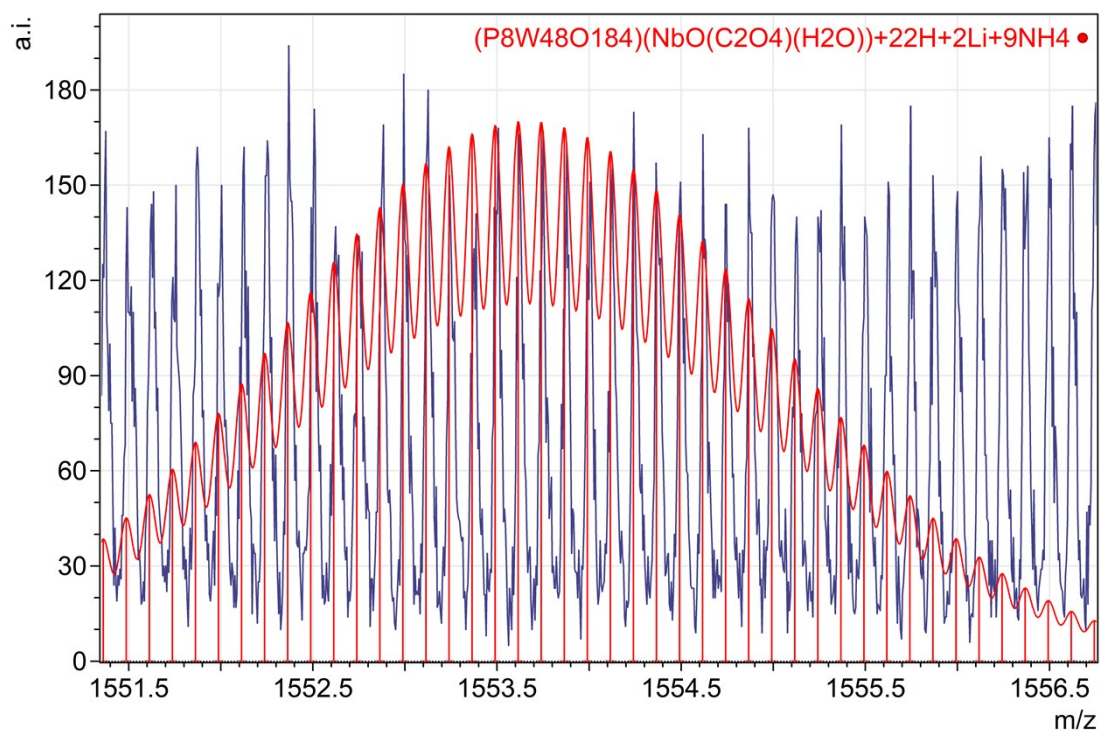

**Fig. S17.** Comparison between experimental and calculated values of isotopic patterns for  $\{[P_8W_{48}O_{184}(NbO(C_2O_4)(H_2O)) + 22H^+ + 2Li^+ + 9NH_4^+]^{6-}$

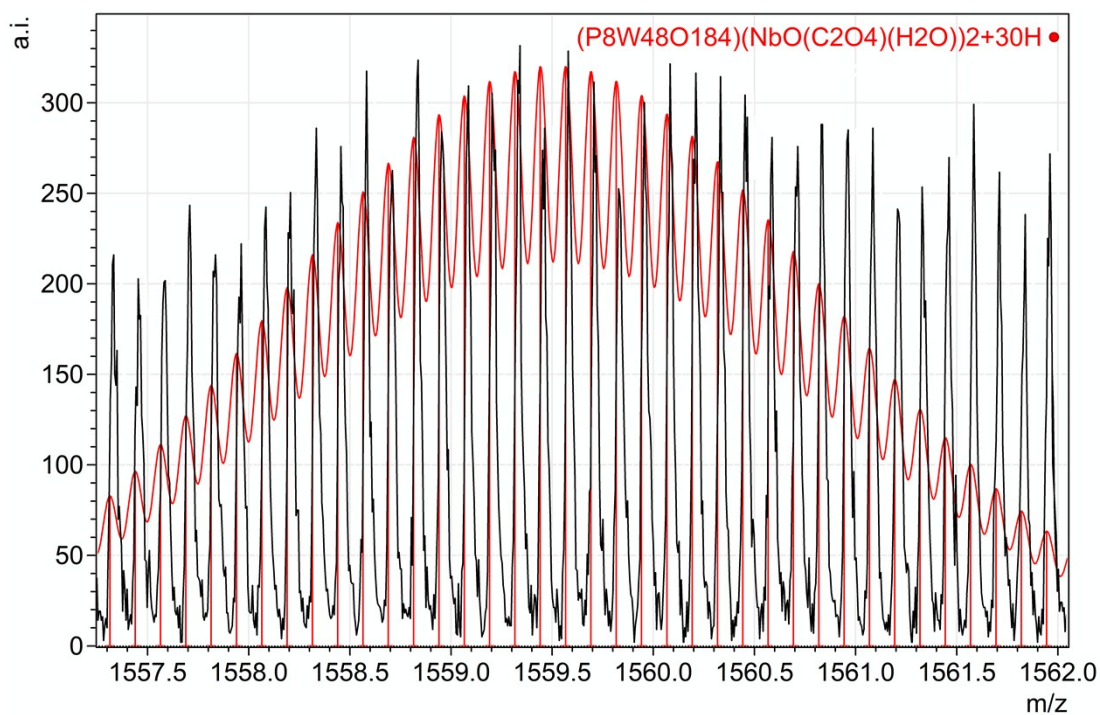

**Fig. S18.** Comparison between experimental and calculated values of isotopic patterns for  $\{[P_8W_{48}O_{184}(NbO(C_2O_4)(H_2O))_2 + 30H^+]^{8-}$

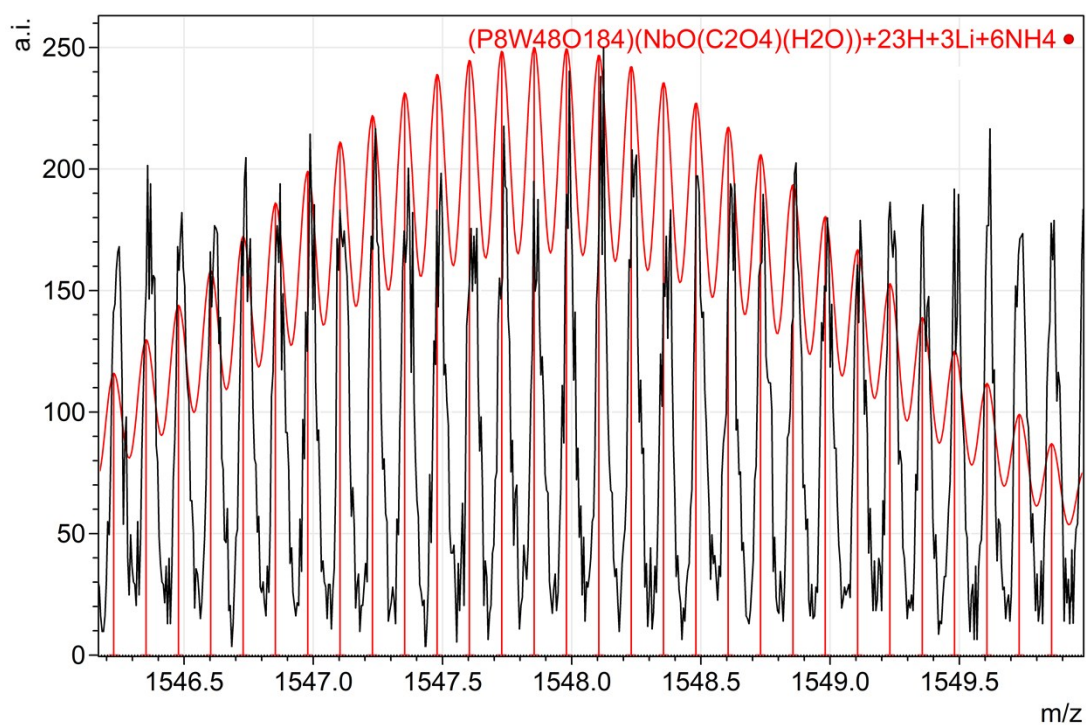

**Fig. S19.** Comparison between experimental and calculated values of isotopic patterns for  $\{[P_8W_{48}O_{184}(NbO(C_2O_4)(H_2O)) + 23H^+ + 3Li^+ + 6NH_4^+]\}^{7-}$

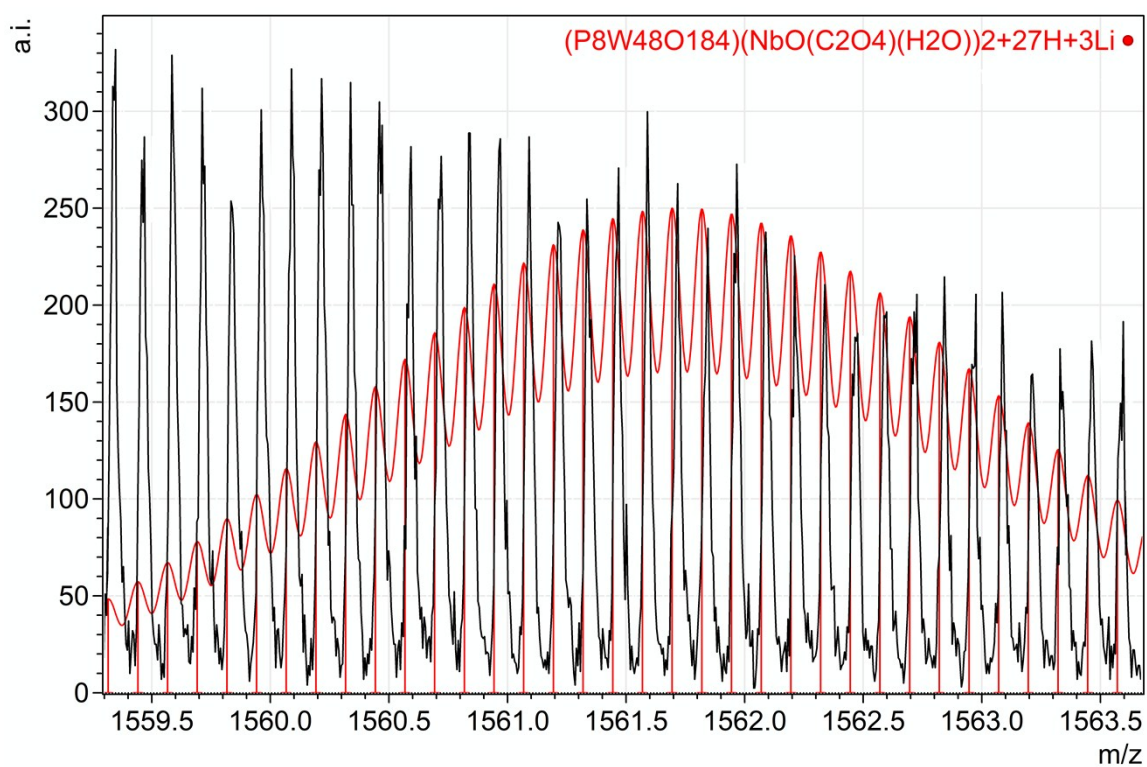

**Fig. S20.** Comparison between experimental and calculated values of isotopic patterns for  $\{[P_8W_{48}O_{184}(NbO(C_2O_4)(H_2O))_2 + 27H^+ + 3Li^+]\}^{8-}$

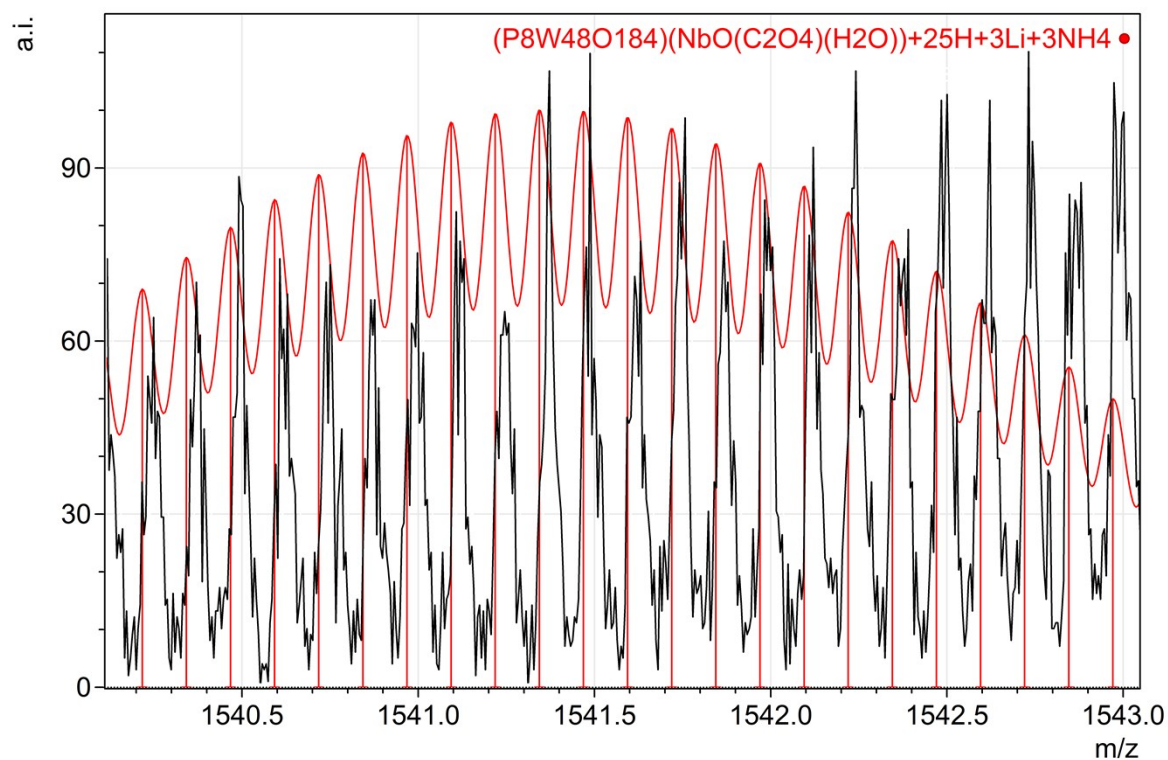

**Fig. S21.** Comparison between experimental and calculated values of isotopic patterns for  $\{[P_8W_{48}O_{184}(NbO(C_2O_4)(H_2O)) + 25H^+ + 3Li^+ + 3NH_4^+]\}^{8-}$

**Table S3. Experimental details**

|                                                                            | <b>1</b>                                                                                                                                                                                    |
|----------------------------------------------------------------------------|---------------------------------------------------------------------------------------------------------------------------------------------------------------------------------------------|
| Chemical formula                                                           | Nb <sub>3.68</sub> O <sub>238</sub> P <sub>8</sub> W <sub>48</sub>                                                                                                                          |
| $M_r$                                                                      | 13222.47                                                                                                                                                                                    |
| Crystal system, space group                                                | Tetragonal, $I4/m$                                                                                                                                                                          |
| Temperature (K)                                                            | 130                                                                                                                                                                                         |
| $a, c$ (Å)                                                                 | 25.6122 (5), 22.0939 (5)                                                                                                                                                                    |
| $V$ (Å <sup>3</sup> )                                                      | 14493.3 (7)                                                                                                                                                                                 |
| $Z$                                                                        | 2                                                                                                                                                                                           |
| Radiation type                                                             | Mo $K\alpha$                                                                                                                                                                                |
| $\mu$ (mm <sup>-1</sup> )                                                  | 19.24                                                                                                                                                                                       |
| Crystal size (mm)                                                          | 0.12 × 0.08 × 0.05                                                                                                                                                                          |
| Diffractometer                                                             | New Xcalibur, AtlasS2                                                                                                                                                                       |
| Absorption correction                                                      | Multi-scan<br><i>CrysAlis PRO</i> 1.171.38.41 (Rigaku Oxford Diffraction, 2015) Empirical absorption correction using spherical harmonics, implemented in SCALE3 ABSPACK scaling algorithm. |
| $T_{\min}, T_{\max}$                                                       | 0.529, 1.000                                                                                                                                                                                |
| No. of measured, independent and observed [ $I > 2\sigma(I)$ ] reflections | 19190, 6795, 4745                                                                                                                                                                           |
| $R_{\text{int}}$                                                           | 0.036                                                                                                                                                                                       |
| $\theta$ values (°)                                                        | $\theta_{\max} = 25.4, \theta_{\min} = 3.4$                                                                                                                                                 |
| $(\sin \theta/\lambda)_{\max}$ (Å <sup>-1</sup> )                          | 0.602                                                                                                                                                                                       |
| Range of $h, k, l$                                                         | $-28 \leq h \leq 30, -30 \leq k \leq 29, -26 \leq l \leq 21$                                                                                                                                |
| $R[F^2 > 2\sigma(F^2)], wR(F^2), S$                                        | 0.045, 0.116, 1.02                                                                                                                                                                          |
| No. of reflections, parameters, restraints                                 | 6795, 386, 0                                                                                                                                                                                |
| H-atom treatment                                                           | H-atom parameters not defined                                                                                                                                                               |
| Weighting scheme                                                           | $w = 1/[s^2(F_o^2) + (0.0458P)^2 + 505.568P]$<br>where $P = (F_o^2 + 2F_c^2)/3$                                                                                                             |
| $\Delta\rho_{\max}, \Delta\rho_{\min}$ (e Å <sup>-3</sup> )                | 1.46, -1.51                                                                                                                                                                                 |

Computer programs: *CrysAlis PRO* 1.171.38.41 (Rigaku OD, 2015), *SHELXS2014* (Sheldrick, 2014), *SHELXL2014* (Sheldrick, 2014), ShelXle (Hübschle, 2011), CIFTAB-2014 (Sheldrick, 2014).

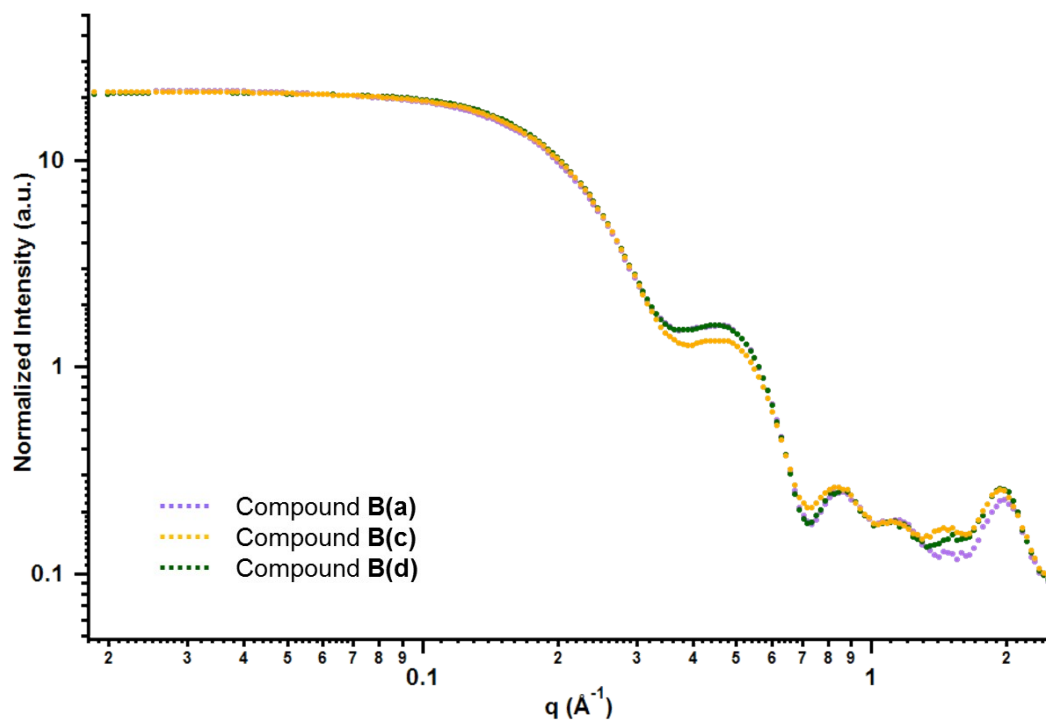

**Fig S22.** Experimental SAXS curves of the compounds B(a) (purple), B(c) (gold) and B(d) (green).

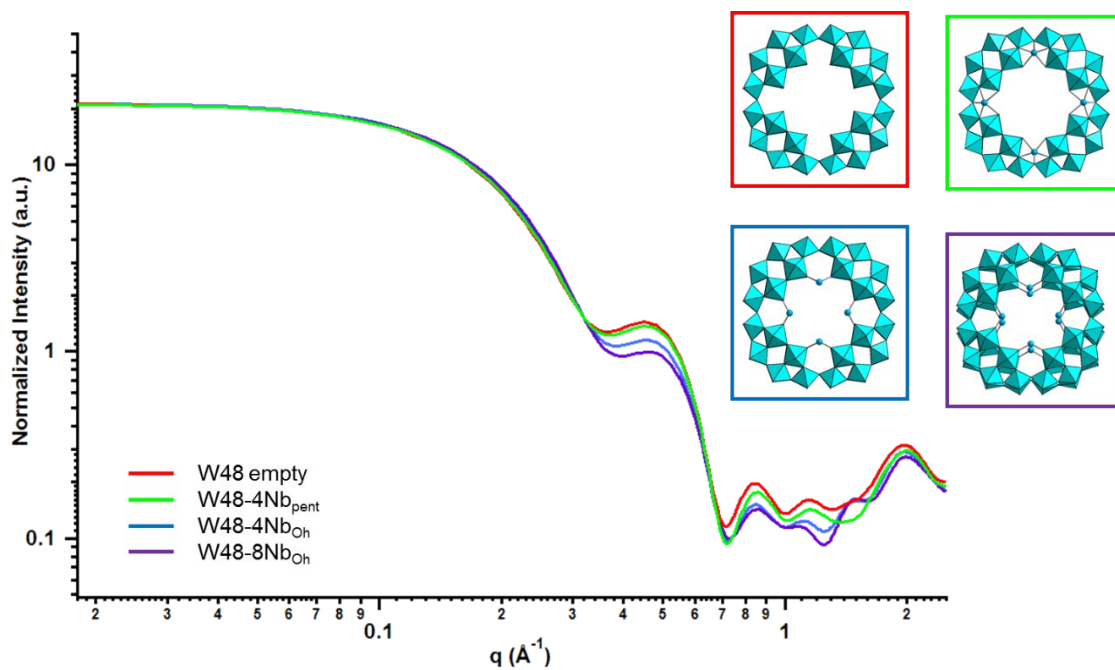

**Fig S23.** Simulated scattering curves of empty  $P_8W_{48}$  cluster (red),  $P_8W_{48}$  incorporating 4 Nb in the pentagonal position (green),  $P_8W_{48}$  incorporating 4 Nb in the common site-(blue) or  $P_8W_{48}$  incorporating 8 Nb in the common site-(purple).

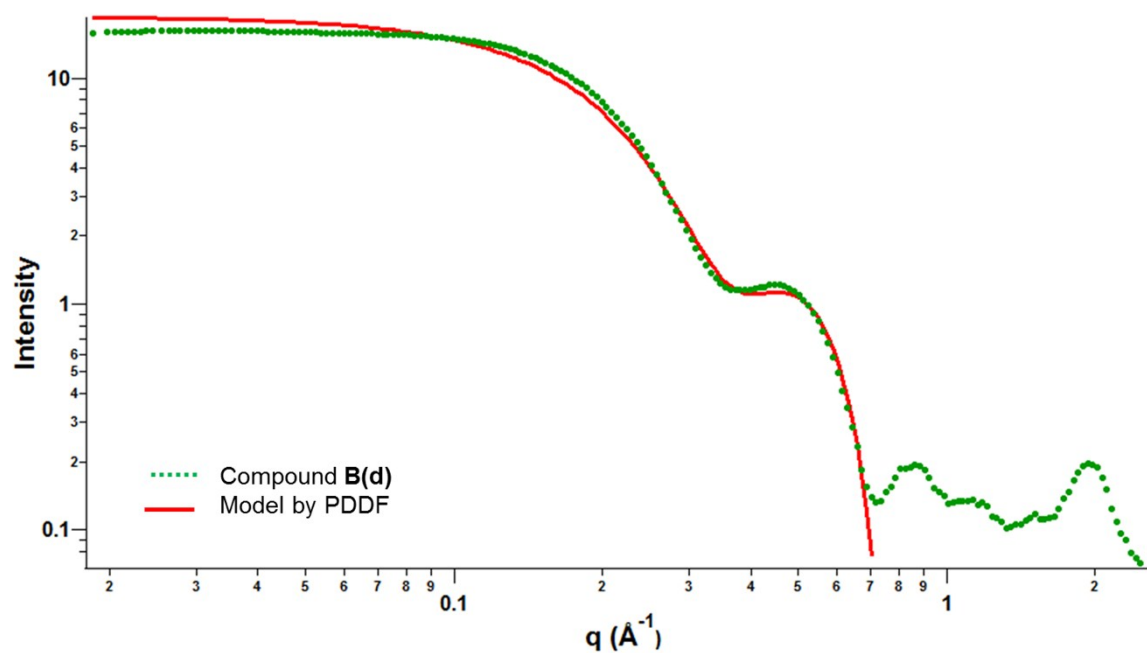

**Fig S24.** Scattering curve of compound B(d) (green dots) and the calculated scattering curve obtained by PDDF (red).

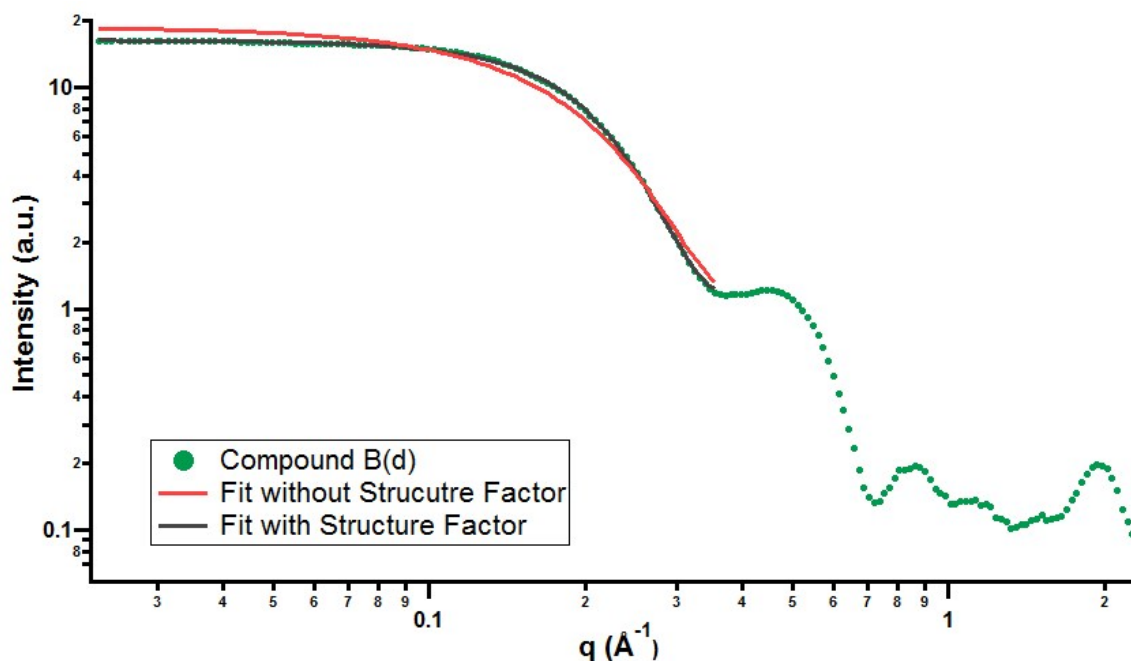

**Fig S25.** Experimental scattering curve of compound **B(d)** (green dots) along the spherical model fit in a dilute system (red line) and the spherical model including a structure factor : center-to-center distance between clusters = 24.8  $\text{\AA}$ , and number of nearest neighbors to a cluster = 0.47 (black line).

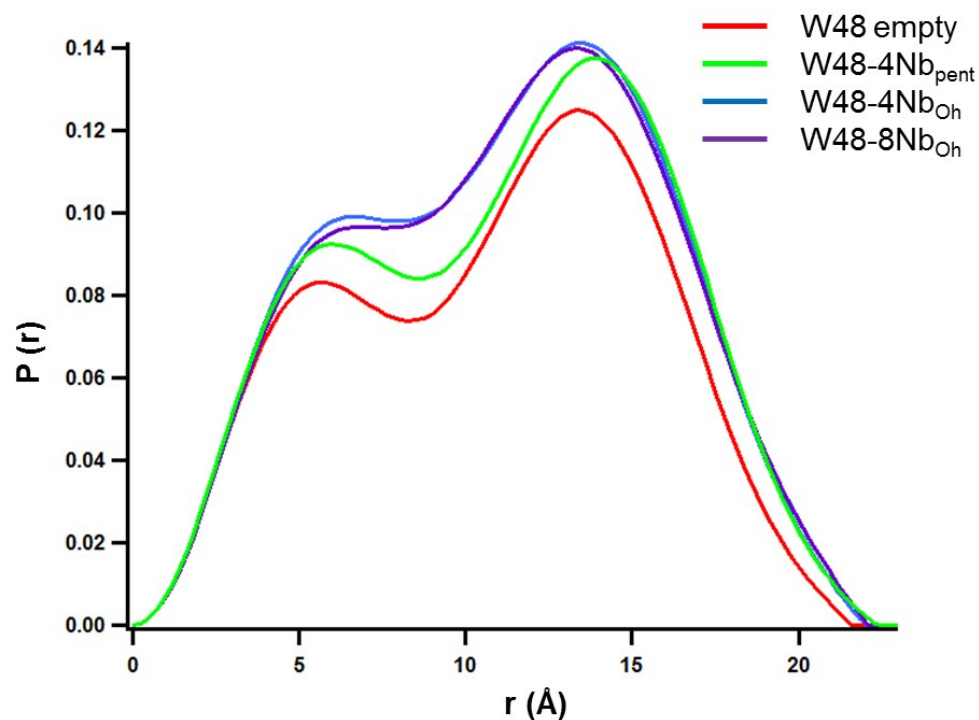

**Fig S26.** The PDDFs (pair distance distribution function) for empty  $P_8W_{48}$  cluster (red),  $P_8W_{48}$  incorporating 4 Nb in the pentagonal position (green),  $P_8W_{48}$  incorporating 4 Nb in the common site (blue) or  $P_8W_{48}$  incorporating 8 Nb in the common site (purple).

**Table S4.** Size of species determine by PDDF analysis of the scattering curves.

| <b>Compound</b> | <b><math>R_g</math> (Guinier) Å</b> | <b>Diameter (Å)</b> |
|-----------------|-------------------------------------|---------------------|
| <b>B(a)</b>     | 8.41                                | 22.53               |
| <b>B(c)</b>     | 8.36                                | 22.48               |
| <b>B(d)</b>     | 8.34                                | 22.00               |
| <b>1*</b>       |                                     | 23.1                |

\* Diameter obtained from the X-ray structure
